# Supplementary material for: Effect of the COVID-19 pandemic on mortality of patients with STEMI: a systematic review and meta-analysis
Source: HighWire-hosted journal article supplement (doi:10.1136/heartjnl-2020-318360), 2020-12-17
Supplement: heartjnl-2020-318360supp001_data_supplement.pdf [file heartjnl-2020-318360supp001_data_supplement.pdf]

A

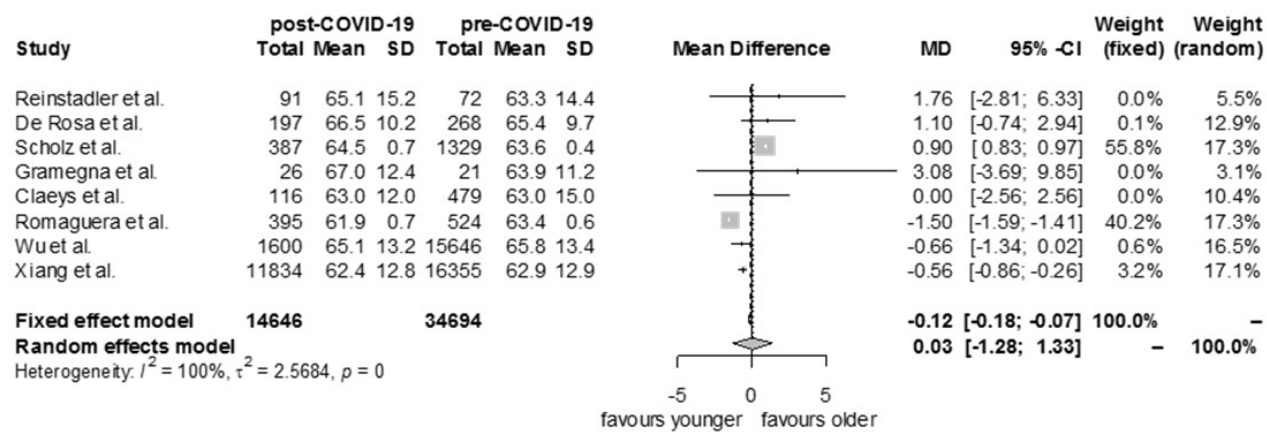

B

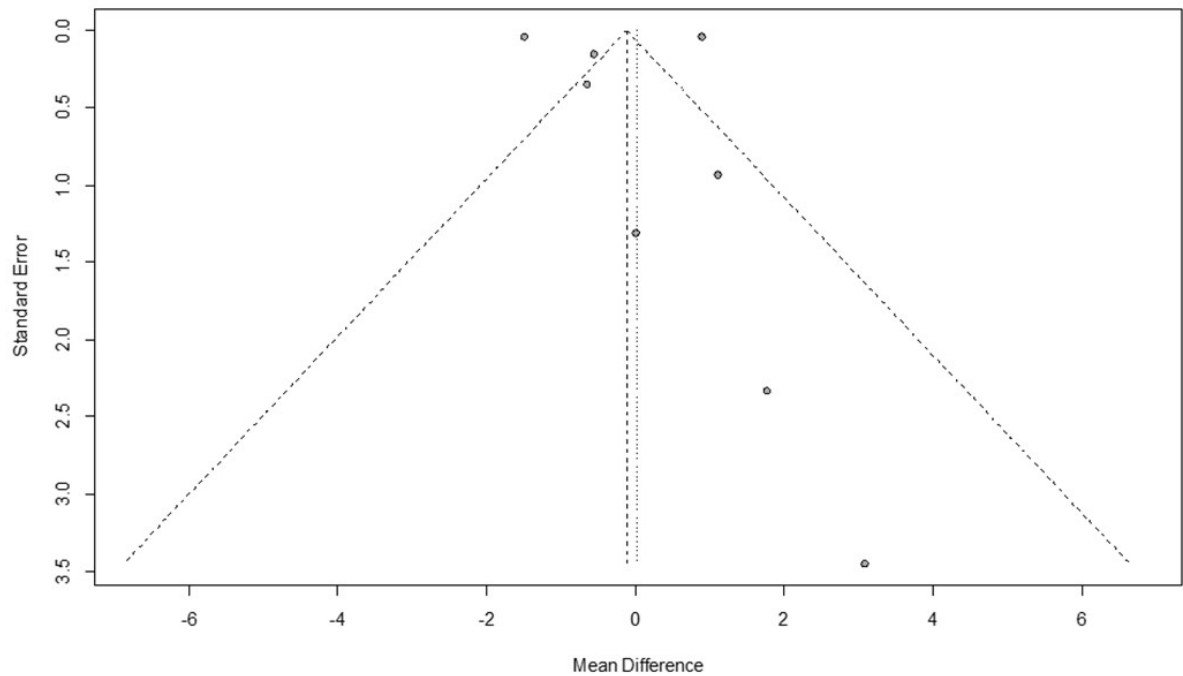

**Supplementary Figure 1. Forest plot and funnel plot – age**  
(A) Forest plot. (B) Funnel plot.

A

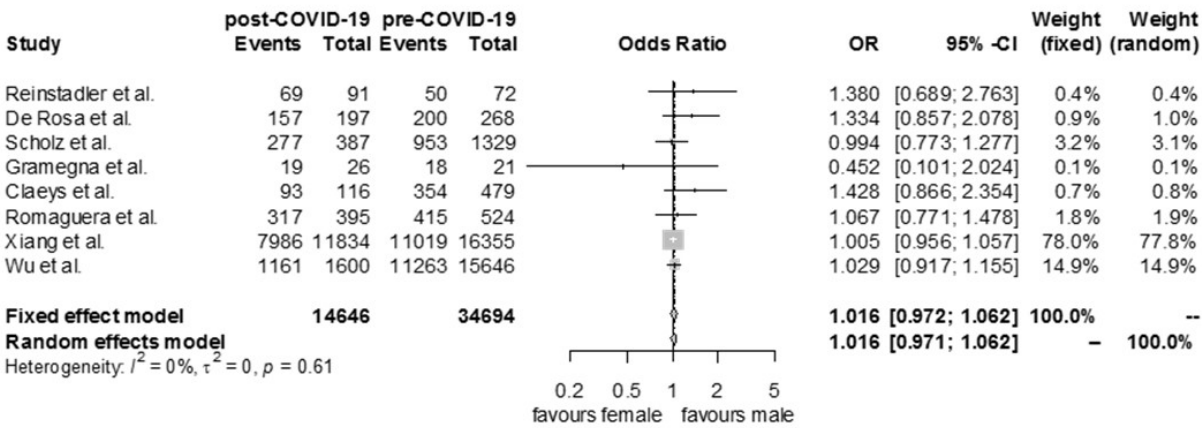

B

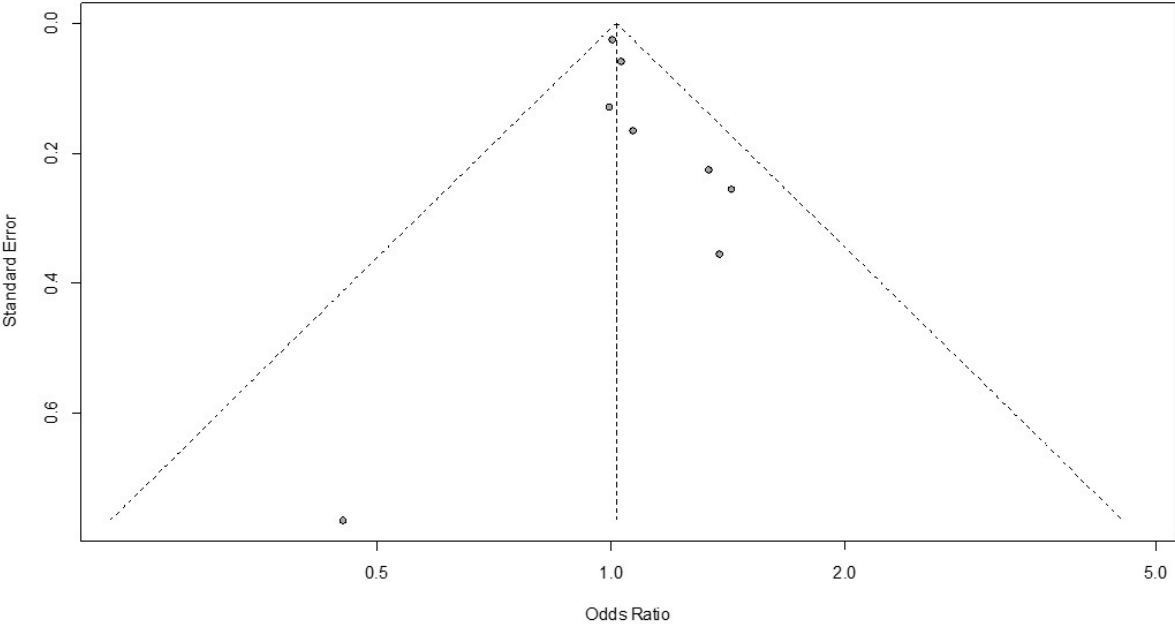

Supplementary Figure 2. Forest plot and funnel plot – sex  
(A) Forest plot. (B) Funnel plot.

A

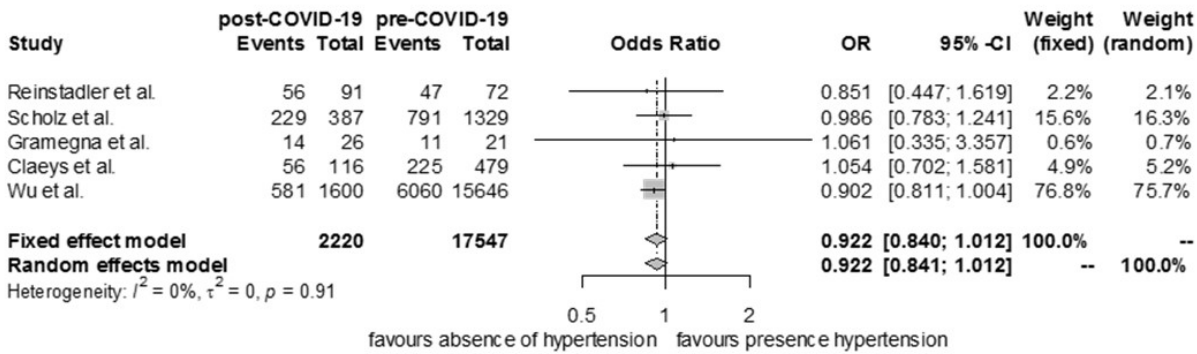

B

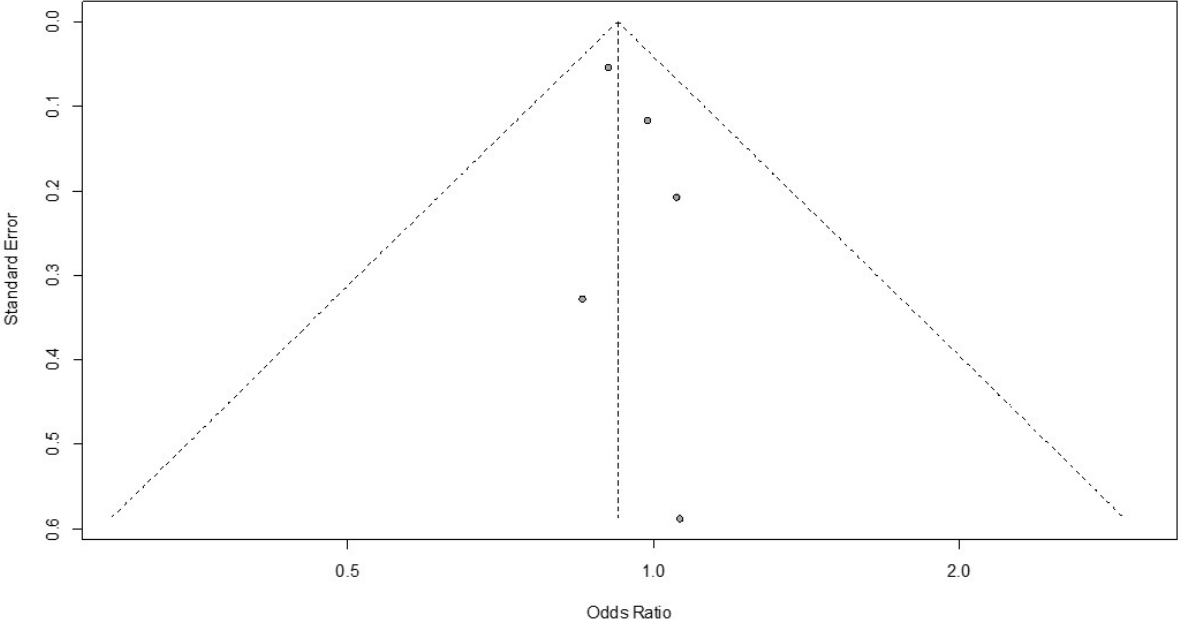

Supplementary Figure 3. Forest plot and funnel plot – arterial hypertension  
(A) Forest plot. (B) Funnel plot.

A

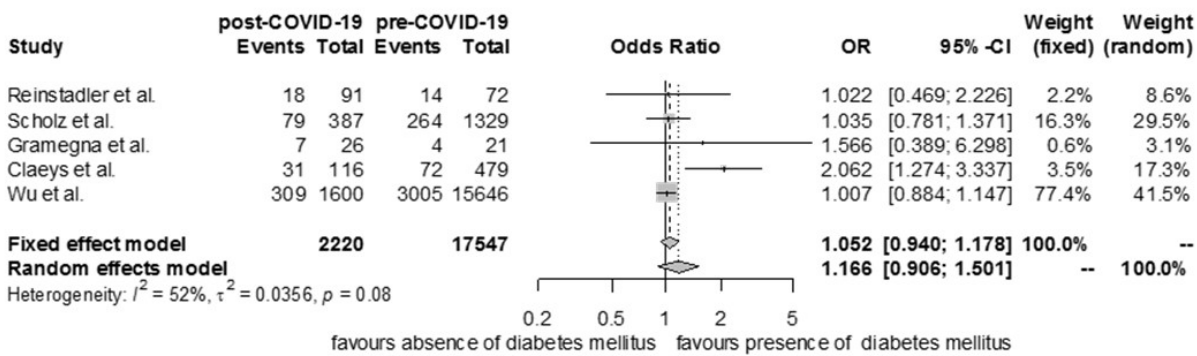

B

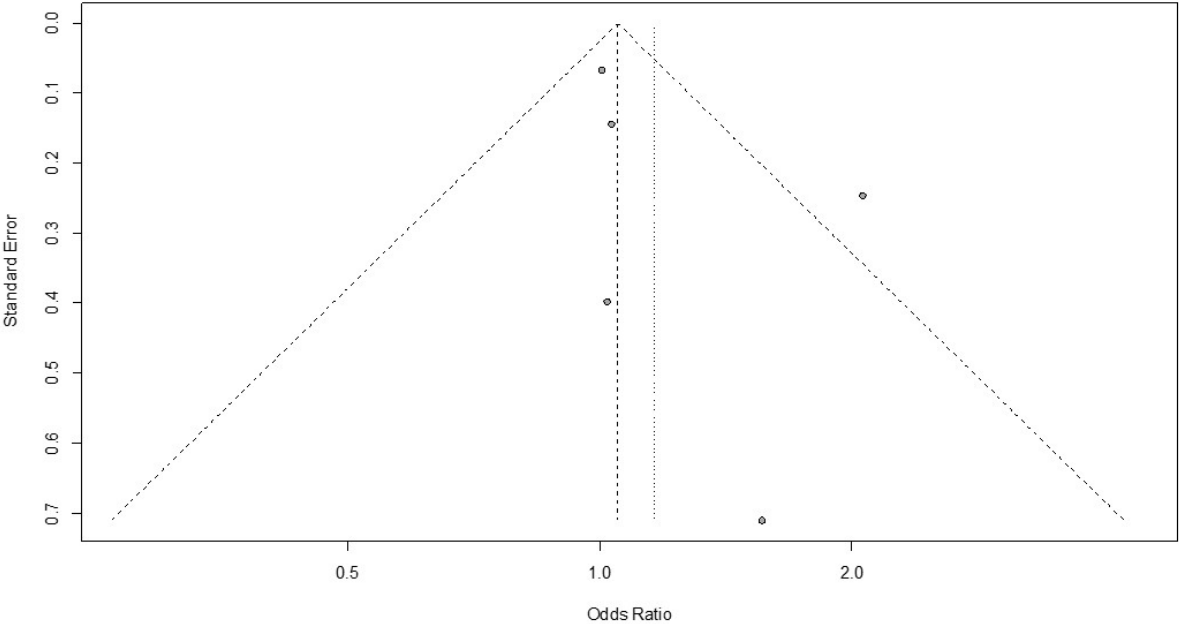

Supplementary Figure 4. Forest plot and funnel plot – diabetes mellitus  
(A) Forest plot. (B) Funnel plot.

A

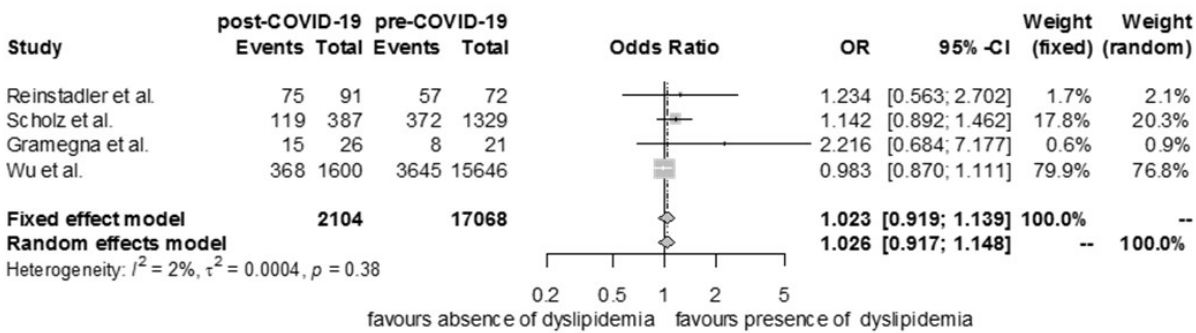

B

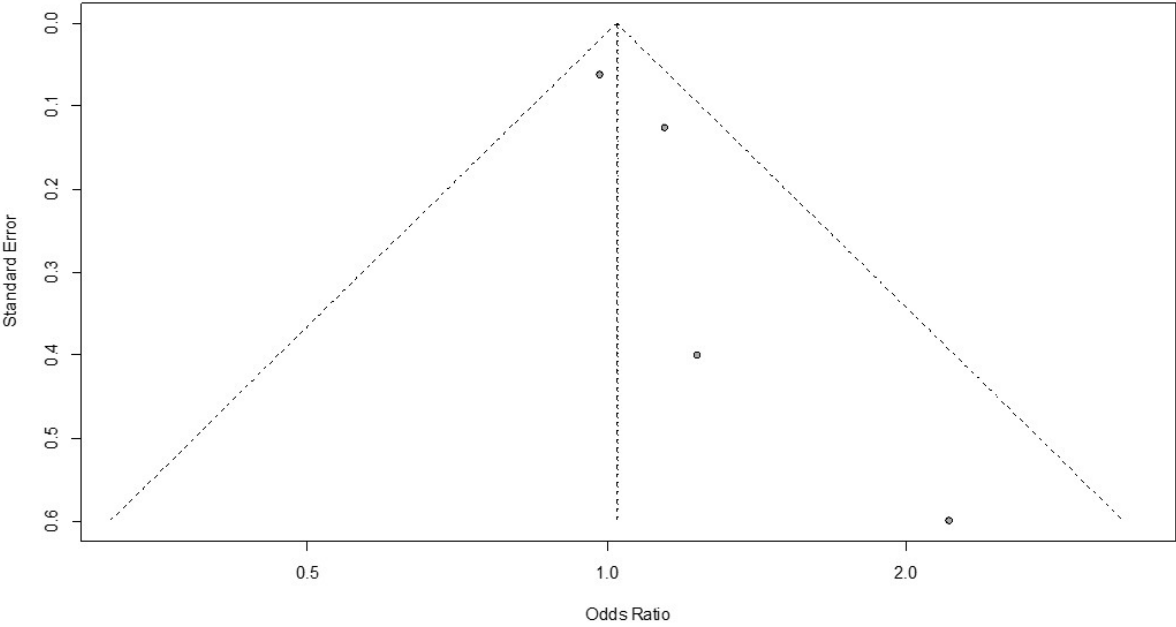

Supplementary Figure 5. Forest plot and funnel plot – dyslipidemia  
(A) Forest plot. (B) Funnel plot.

A

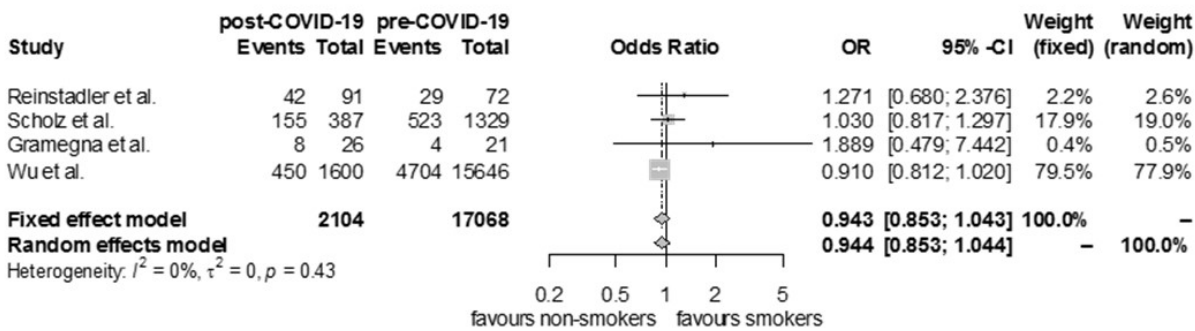

B

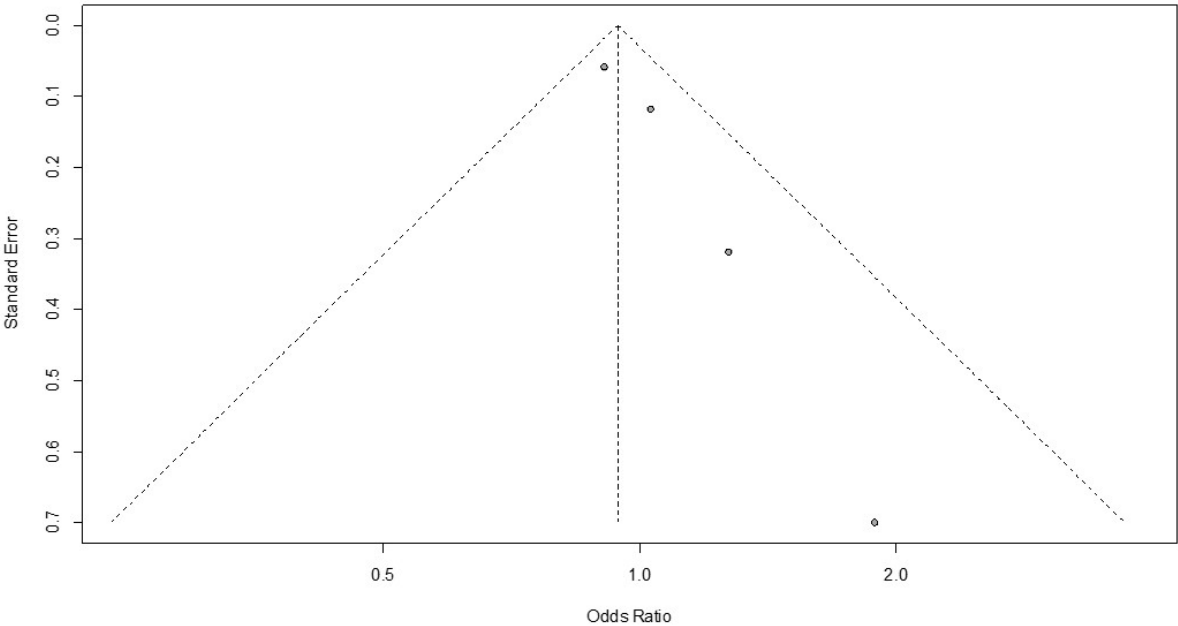

Supplementary Figure 6. Forest plot and funnel plot – smoking  
(A) Forest plot. (B) Funnel plot.

A

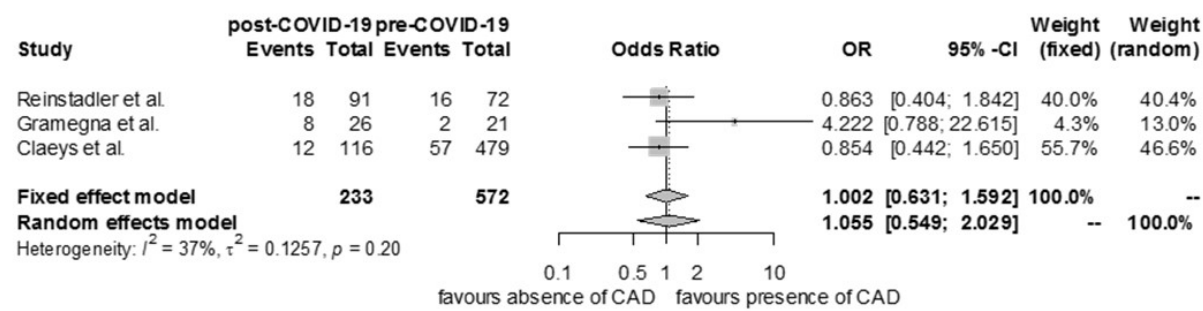

B

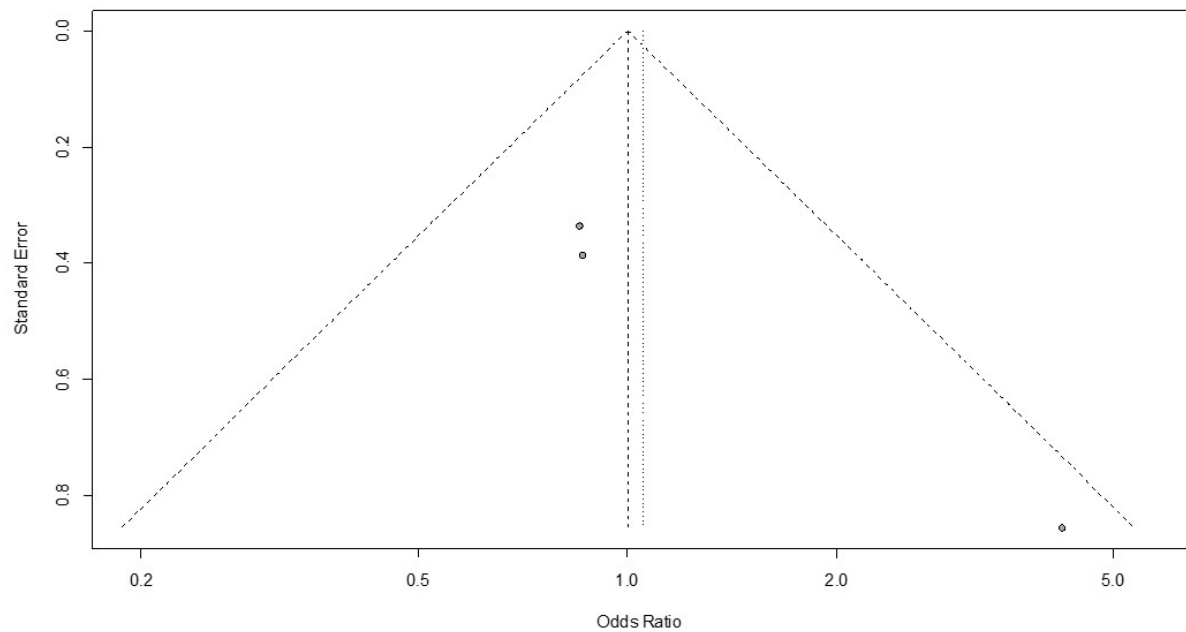

**Supplementary Figure 7. Forest plot and funnel plot – known coronary artery disease**  
(A) Forest plot. (B) Funnel plot.

A

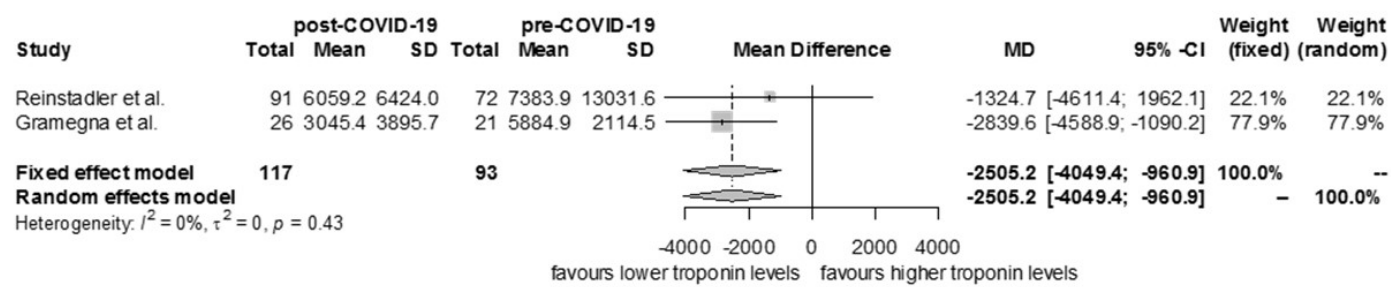

B

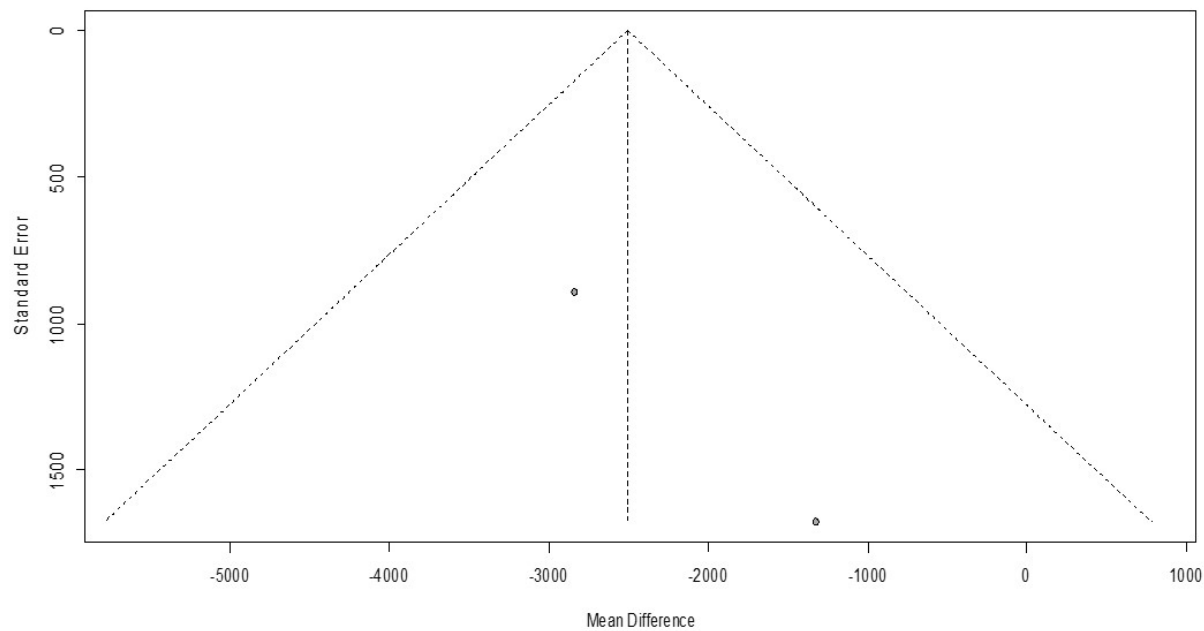

Supplementary Figure 8. Forest plot and funnel plot – peak serum troponin levels  
(A) Forest plot. (B) Funnel plot.



A

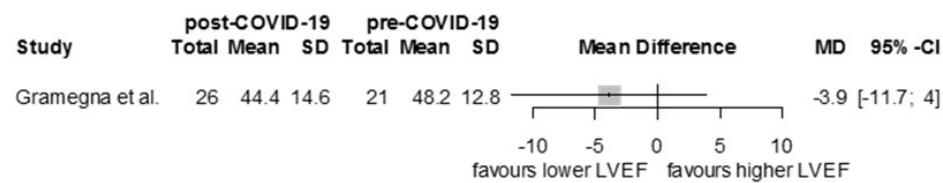

B

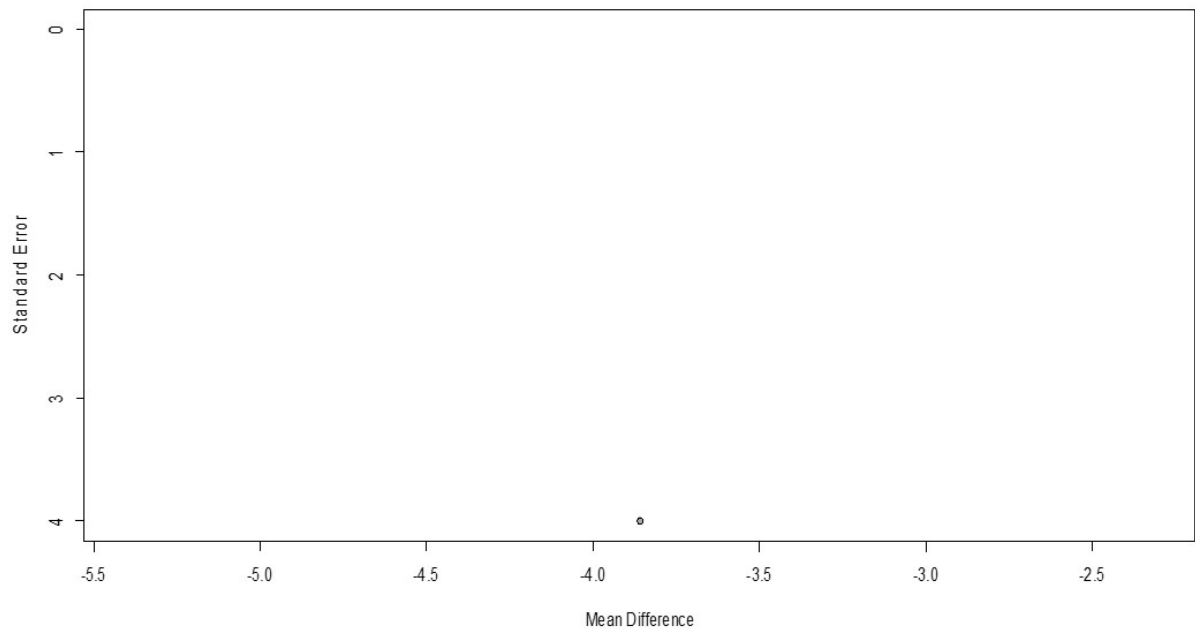

**Supplementary Figure 9. Forest plot and funnel plot – left ventricular ejection fraction**  
(A) Forest plot. (B) Funnel plot.

| Supplementary table 1. Study periods |                               |                     |
|--------------------------------------|-------------------------------|---------------------|
| Study                                | pre-COVID-19                  | post-COVID-19       |
| Claeys et al.                        | 13.03. - 03.04.2017/2018/2019 | 13.03. - 03.04.2020 |
| De Rosa et al.                       | 12.03. - 19.03.2019           | 12.03. - 19.03.2020 |
| Gramegna et al.                      | 21.02. - 01.04.2018/2019      | 21.02. - 01.04.2020 |
| Reinstadler et al.                   | 24.02. - 08.03.2020           | 09.03. - 05.04.2020 |
| Romaguera et al.                     | 01.03. - 19.04.2019           | 01.03. - 19.04.2020 |
| Scholz et al.                        | 01.03. - 31.03.2017/2018/2019 | 01.03. - 31.03.2020 |
| Trabattoni et al.                    | 08.03. - 10.04.2019           | 08.03. - 10.04.2020 |
| Wu et al.                            | 01.01.2019 - 22.03.2020       | 23.03. - 22.05.2020 |
| Xiang et al.                         | 27.12.2019 - 23.01.2020       | 24.01. - 20.02.2020 |
| Zhang et al.                         | 01.01. - 31.03.2018/2019      | 01.01. - 31.03.2020 |
